# Supplementary material
Source: HighWire-hosted journal article supplement (http://dmd.aspetjournals.org/highwire/filestream/66439/field_highwire_adjunct_files/0/DMD-Cilengitide-Data_supplement.pdf)

## Data Supplement

### Time- and NADPH-Dependent Inhibition of P450 3A4 by the Cyclopentapeptide Cilengitide: Significance of the Guanidine Group and Accompanying Spectral Changes

Mirza Bojić, Luca Barbero, Hugues Dolgos, Achim Freisleben, Dieter Galleman, Simona Riva, and F. Peter Guengerich

#### Drug Metabolism and Disposition

**Fig. S1.** NMR and MS data of acetylated ornithine analogue of cilengitide. (A) NMR spectra were recorded on a Bruker AV400 (400 MHz) spectrometer (Bruker AXS Inc., Madison, WI).  $^1\text{H}$  NMR ( $\text{D}_2\text{O}$ , 400 MHz) showed a characteristic peak at  $\delta$  1.96 (s, 3H) that corresponds to the acetyl group, compared to the ornithine analogue of cilengitide (B). LC-MS analysis was performed on an Acquity UPLC (Waters, Milford, MA) coupled with an LTQ Orbitrap XL (Thermo Fisher Scientific, Waltham, MA). Separation was achieved on an Acquity UPLC BEH octadecylsilane ( $\text{C}_{18}$ ) column (1.7  $\mu\text{m}$ , 2.1  $\times$  100 mm, Waters) with  $\text{H}_2\text{O}$  and  $\text{CH}_3\text{OH}$  as the mobile phase (flow: 0.3 ml/min, gradient: 0 min, 0%  $\text{CH}_3\text{OH}$ ; 1 min, 0%  $\text{CH}_3\text{OH}$ ; 4 min, 100%  $\text{CH}_3\text{OH}$ ; 5.2 min, 100%  $\text{CH}_3\text{OH}$ ; 5.3 min, 0%  $\text{CH}_3\text{OH}$ ; 8 min, 0%  $\text{CH}_3\text{OH}$ ). Mass spectrometry of the acetylated ornithine derivative in ESI positive mode (C) showed a peak ion at  $m/z$  589 ( $\text{M}^+$ ) that corresponds to the parent compound (calculated 589.2979, found 589.2980,  $\Delta$  0.2 ppm) vs.  $m/z$  547 ( $\text{M}^+$ ), which corresponds to the most intensive parent ion of the ornithine analogue (calculated 547.2875, found 547.2869,  $\Delta$  1.1 ppm).

**A**

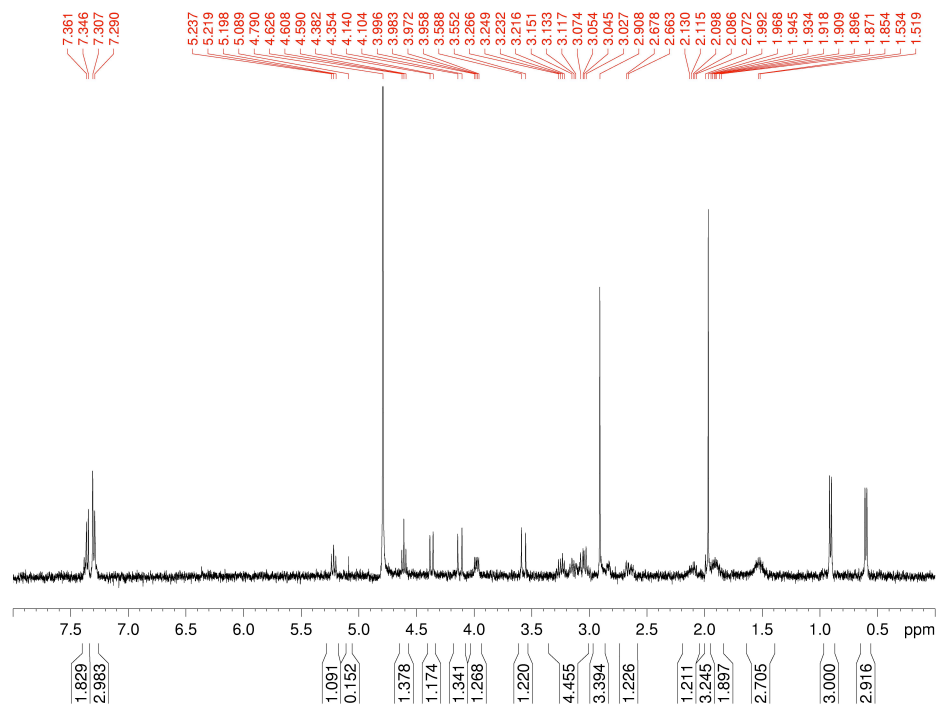

**B**

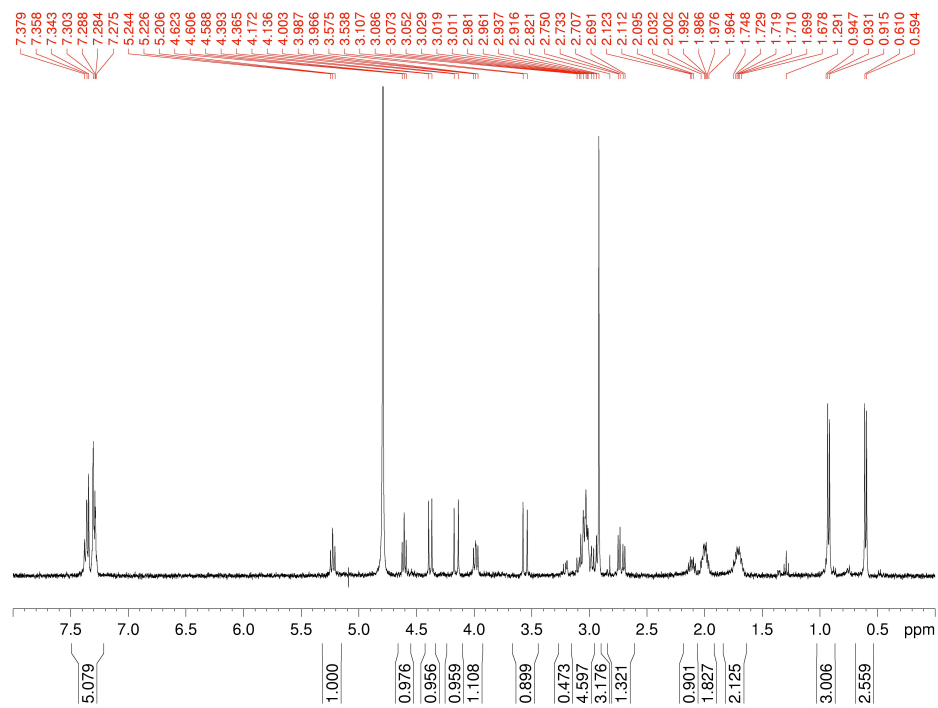

C

MB\_acetylated\_ornithine\_cilengitide\_10uM\_5uL\_injxn\_12\_16\_2013 #55 RT: 4.33 AV: 1 NL: 5.93E6  
F: FTMS + p ESI Full ms [50.00-1000.00]

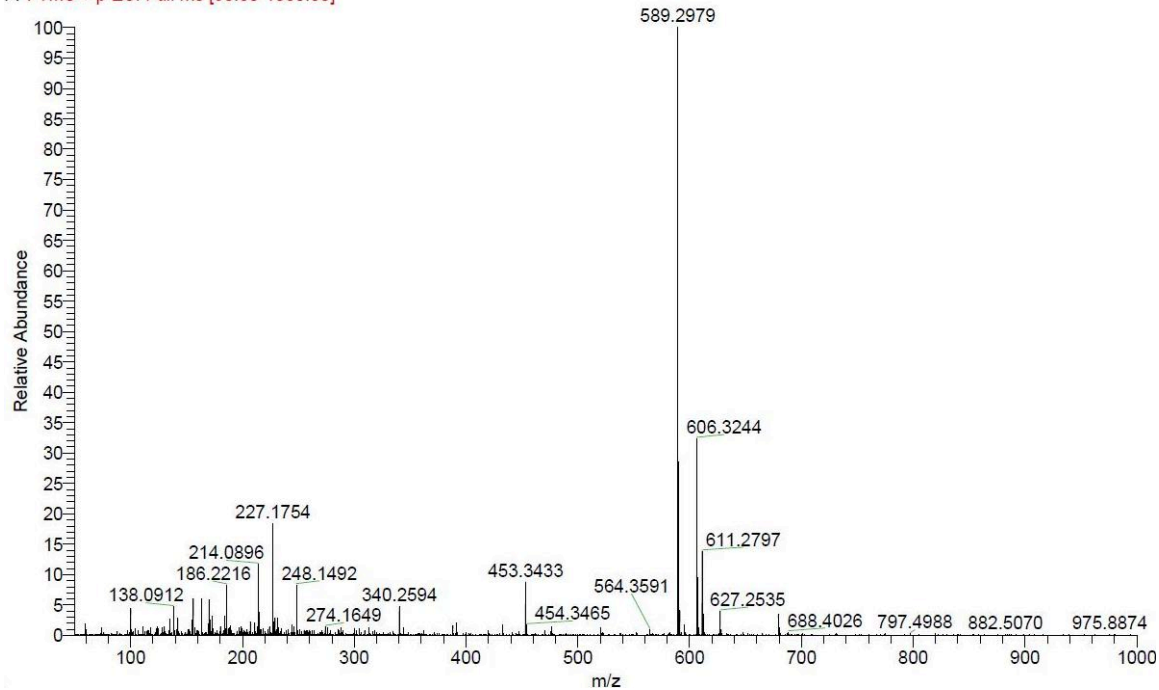

D

MB\_ornithine\_cilengitide\_10uM\_5uL\_injxn\_12\_16\_2013 #50 RT: 3.97 AV: 1 NL: 2.75E6  
F: FTMS + p ESI Full ms [50.00-1000.00]

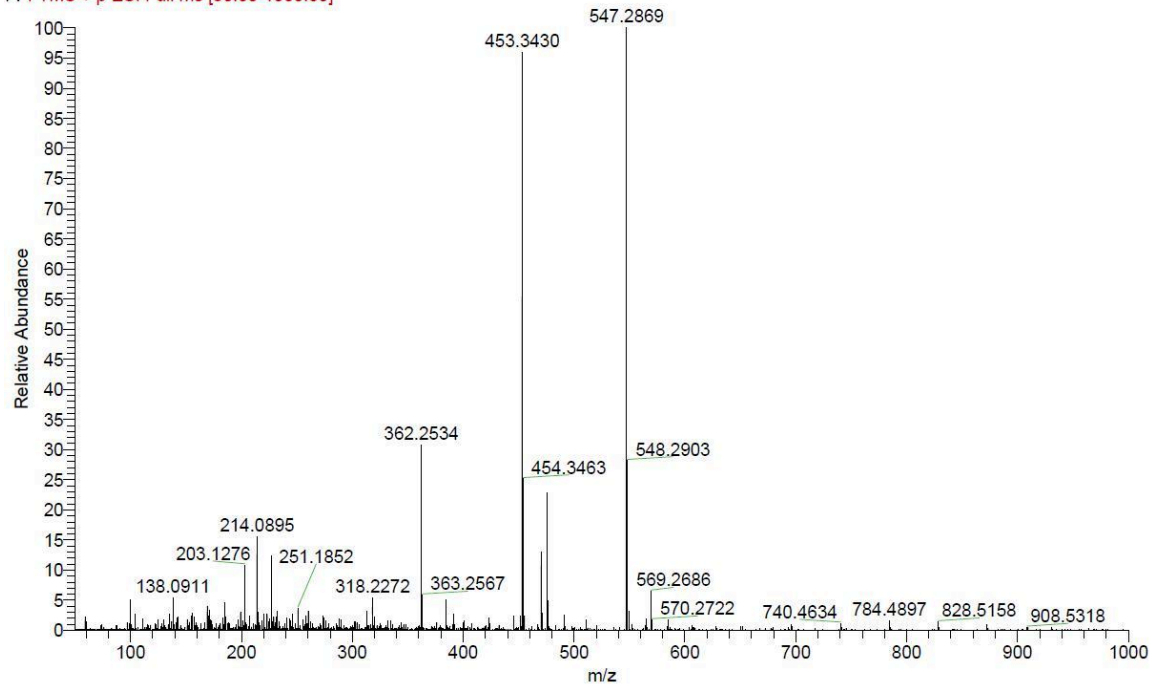

Supplement: DMD-Cilengitide-Data_supplement.pdf [file DMD-Cilengitide-Data_supplement.pdf]
